# Supplementary material
Source: PubMed Central journal article supplement (PMC3754708)
Supplement: AEM.01390-13_zam999104611so1.pdf [file AEM.01390-13_zam999104611so1.pdf]

1 **Supplemental material**

2

3 **TABLE S1** Proteins identified in knobs and mycelia of *M. haptotylum* using LC-MS/MS.

4

5 **TABLE S2** Features of all genes with the Pfam domain WSC in *M. haptotylum*.

6

7 **FIG S1** SDS-PAGE analysis of extracted proteins.

8

9 **FIG S2** Sequence logo of the WSC domain.

10

11 **FIG S3** Distribution of proteins and transcripts in different KOG categories.

12

13 **FIG S4** Phylogeny of 173 WSC Pfam domains from six fungal genomes.

14 **TABLE S1** Proteins identified in knobs and mycelia of *M. haptotylum* using LC-MS/MS.

| NCBI Locus ID <sup>a</sup> | Matching peptides <sup>b</sup> | Knob <sup>c</sup> | Mycelium <sup>c</sup> | Uniprot ID <sup>d</sup> | Description                                      | PHI-base <sup>e</sup> | Phylogeny <sup>f</sup> |
|----------------------------|--------------------------------|-------------------|-----------------------|-------------------------|--------------------------------------------------|-----------------------|------------------------|
| <b>H072_8026</b>           | 3                              | 3                 | 0                     | -                       | -                                                |                       | ss <sup>g</sup>        |
| H072_7202                  | 3                              | 3                 | 0                     | -                       | -                                                |                       | ss <sup>g</sup>        |
| <b>H072_2504</b>           | 1                              | 2                 | 0                     | -                       | -                                                |                       | ls                     |
| <b>H072_4225</b>           | 1                              | 2                 | 0                     | -                       | -                                                |                       | ls                     |
| <b>H072_6857</b>           | 1                              | 1                 | 0                     | -                       | -                                                |                       | ss <sup>g</sup>        |
| <b>H072_8717</b>           | 1                              | 1                 | 0                     | -                       | -                                                |                       | ss <sup>g</sup>        |
| H072_8137                  | 4                              | 3                 | 0                     | B8M6K0                  | 1,3-beta-glucanosyltransferase, putative         | PHR1                  | core                   |
| H072_11580                 | 1                              | 1                 | 0                     | F2S3Q3                  | 26S proteasome regulatory subunit RPN11          |                       | core                   |
| H072_2306                  | 1                              | 1                 | 0                     | A6RMK3                  | 3-hydroxyacyl-CoA dehydrogenase                  |                       | core                   |
| H072_4821                  | 1                              | 1                 | 0                     | C1GSE0                  | 40S ribosomal protein S16                        |                       | core                   |
| H072_858                   | 1                              | 1                 | 0                     | B8MZ16                  | 40S ribosomal protein S25, putative              |                       | core                   |
| H072_9322                  | 2                              | 3                 | 0                     | E3QCX3                  | 6,7-dimethyl-8-ribityllumazine synthase          |                       | core                   |
| H072_6833                  | 4                              | 4                 | 0                     | A3LSL7                  | Agglutinin-like protein 2                        |                       | core                   |
| <b>H072_7564</b>           | 2                              | 3                 | 0                     | A1CHW0                  | Alpha-glucosidase AgdA                           | Gas1                  | core                   |
| H072_10654                 | 1                              | 2                 | 0                     | E4USH8                  | Arginine permease                                |                       | core                   |
| H072_3167                  | 1                              | 1                 | 0                     | A7EH61                  | Argininosuccinate synthetase                     |                       | core                   |
| H072_5606                  | 1                              | 1                 | 0                     | C1GKS3                  | ARP2/3 complex 20 kDa subunit                    |                       | core                   |
| H072_6336                  | 1                              | 3                 | 0                     | E9E375                  | ATP-dependent Zn protease                        | PEX6                  | core                   |
| <b>H072_3089</b>           | 1                              | 1                 | 0                     | B6QPL5                  | BAR domain protein                               |                       | core                   |
| H072_8969                  | 1                              | 1                 | 0                     | Q68KY1                  | Beta-glucosidase                                 | um00446               | core                   |
| H072_8828                  | 2                              | 1                 | 0                     | B2VYL4                  | cAMP-dependent protein kinase regulatory subunit | RPK1                  | core                   |
| H072_5305                  | 1                              | 1                 | 0                     | O94255                  | Carbonic anhydrase                               | Can2                  | core                   |
| H072_7670                  | 1                              | 1                 | 0                     | A5AB21                  | Carboxypeptidase Y                               | um01886               | core                   |

|                   |   |   |   |        |                                                      |      |      |
|-------------------|---|---|---|--------|------------------------------------------------------|------|------|
| H072_11090        | 4 | 2 | 0 | B6JV38 | Cell agglutination protein mam3                      |      | core |
| H072_4865         | 1 | 1 | 0 | B2WKN9 | Chaperone protein dnaK                               |      | core |
| H072_5869         | 1 | 1 | 0 | B2W796 | Chitin biosynthesis protein CHS5                     | MRB1 | core |
| H072_5258         | 1 | 1 | 0 | B9R282 | 'Cold-shock' DNA-binding domain protein              |      | core |
| H072_5249         | 1 | 1 | 0 | Q9TYL3 | C-type lectin protein 122                            |      | ls   |
| <b>H072_11420</b> | 3 | 2 | 0 | Q19AS3 | Cuticle-degrading serine protease                    |      | core |
| H072_10767        | 1 | 1 | 0 | C5PDZ1 | Cyclophilin B, putative                              | CPA1 | core |
| H072_9166         | 1 | 1 | 0 | Q4WTN4 | D-3-phosphoglycerate dehydrogenase                   |      | core |
| H072_11462        | 1 | 1 | 0 | C5PC30 | Dihydrolipoamide acetyltransferase, putative         |      | core |
| H072_8843         | 1 | 1 | 0 | B6QTM2 | Dihydrolipoamide succinyltransferase                 |      | core |
| H072_777          | 1 | 1 | 0 | G3J6B0 | DUF543 domain protein                                |      | core |
| <b>H072_9522</b>  | 1 | 2 | 0 | B6QSL6 | Endo alpha-1,4 polygalactosaminidase                 |      | core |
| H072_6866         | 1 | 1 | 0 | B2WFL9 | Eukaryotic translation initiation factor 3 subunit M |      | core |
| <b>H072_5927</b>  | 1 | 1 | 0 | C8VQV2 | Exo-beta-1,3-glucanase                               |      | core |
| <b>H072_1293</b>  | 2 | 3 | 0 | B0XYK6 | Extracellular serine-rich protein, putative          |      | core |
| H072_8109         | 1 | 1 | 0 | A1CAW6 | Extracellular serine-threonine rich protein          |      | core |
| H072_3103         | 1 | 1 | 0 | C5FMX2 | FAD binding domain-containing protein                |      | core |
| H072_1852         | 1 | 1 | 0 | A1CG01 | Ferulic acid esterase (FaeA), putative               |      | core |
| H072_6764         | 2 | 1 | 0 | Q5USB2 | Gas1-like protein                                    | GAS1 | core |
| H072_4513         | 1 | 1 | 0 | E3QVC3 | Gelsolin                                             |      | core |
| H072_7455         | 1 | 1 | 0 | Q5B093 | Glucose-6-phosphate isomerase                        |      | core |
| <b>H072_10613</b> | 1 | 1 | 0 | B2WFA1 | Glucosidase 2 subunit beta                           |      | core |
| H072_5488         | 1 | 2 | 0 | A1CUX5 | Glutathione S-transferase family protein             |      | core |
| H072_10458        | 1 | 2 | 0 | A8N6M0 | Glycine-rich RNA binding protein                     |      | core |
| H072_8800         | 1 | 1 | 0 | F0XIB2 | GPI anchored cell wall protein                       |      | core |
| H072_10737        | 1 | 1 | 0 | C0P137 | Isocitrate dehydrogenase                             |      | core |

|                   |   |   |   |        |                                               |           |      |
|-------------------|---|---|---|--------|-----------------------------------------------|-----------|------|
| H072_4751         | 1 | 1 | 0 | C5DIY2 | KLTH0E16082p                                  |           | core |
| H072_7185         | 1 | 1 | 0 | E3QQL9 | LSM domain-containing protein                 |           | core |
| <b>H072_9427</b>  | 6 | 4 | 0 | B8MP05 | Maltose phosphorylase                         |           | core |
| <b>H072_8764</b>  | 2 | 1 | 0 | F2RLV9 | Metallopeptidase domain protein               |           | ss   |
| H072_5236         | 1 | 1 | 0 | B8MQJ3 | Mitochondrial ATPase subunit ATP4, putative   |           | core |
| H072_9628         | 1 | 1 | 0 | B0XTW8 | Mitochondrial F1F0 ATP synthase subunit Atp18 |           | core |
| <b>H072_1845</b>  | 1 | 1 | 0 | Q4CTP5 | Mucin TcMUCI, putative                        |           | ss   |
| H072_8860         | 1 | 1 | 0 | E3QMN8 | Myosin regulatory light chain cdc4            |           | core |
| H072_4934         | 1 | 1 | 0 | A1CM74 | NADH-ubiquinone oxidoreductase B14 subunit    |           | core |
| H072_9492         | 1 | 1 | 0 | B6Q1W8 | Nascent polypeptide-associated complex        |           | core |
| H072_462          | 1 | 1 | 0 | B6QBA6 | Nuclear segregation protein (Bfr1), putative  |           | core |
| H072_9167         | 2 | 1 | 0 | B6QGR2 | Nucleosome assembly protein Nap1, putative    |           | core |
| <b>H072_10638</b> | 1 | 1 | 0 | E9EEH8 | Outer membrane autotransporter                |           | core |
| H072_2342         | 1 | 2 | 0 | F9WZR8 | Peptidase aspartic                            | MGG_01748 | core |
| H072_7530         | 1 | 1 | 0 | E9DTG2 | Pre-mRNA splicing factor (Srp1), putative     |           | core |
| <b>H072_448</b>   | 2 | 2 | 0 | Q5BCF8 | Probable feruloyl esterase B                  |           | core |
| <b>H072_10254</b> | 4 | 2 | 0 | Q9P6S0 | Putative cell agglutination protein           |           | core |
| <b>H072_973</b>   | 1 | 1 | 0 | Q9P6S0 | Putative cell agglutination protein           |           | core |
| <b>H072_6835</b>  | 2 | 4 | 0 | E9F139 | Putative glyoxal oxidase                      |           | core |
| <b>H072_10205</b> | 3 | 3 | 0 | E9F139 | Putative glyoxal oxidase                      |           | core |
| H072_10940        | 1 | 2 | 0 | E9F139 | Putative glyoxal oxidase                      |           | core |
| <b>H072_8804</b>  | 3 | 2 | 0 | E9F139 | Putative glyoxal oxidase                      |           | core |
| H072_5095         | 2 | 1 | 0 | E9F139 | Putative glyoxal oxidase                      |           | core |
| H072_1462         | 2 | 1 | 0 | B6Q9R4 | Ran-specific GTPase-activating protein        |           | core |
| H072_5796         | 1 | 1 | 0 | A1DDD5 | RNA annealing protein Yra1, putative          |           | core |
| H072_5208         | 4 | 2 | 0 | B2WDQ6 | RNA binding domain containing protein         |           | core |

|                  |   |   |   |        |                                              |        |                 |
|------------------|---|---|---|--------|----------------------------------------------|--------|-----------------|
| H072_5543        | 1 | 1 | 0 | G2XUB8 | Similar to small nuclear ribonucleoprotein g |        | core            |
| H072_2885        | 1 | 1 | 0 | G3FEJ1 | Snodprot                                     |        | core            |
| H072_6341        | 1 | 1 | 0 | G3FEJ1 | Snodprot                                     |        | core            |
| H072_3765        | 2 | 2 | 0 | C5JF23 | Sorbitol utilization protein SOU1            | Mdh1   | core            |
| H072_3441        | 1 | 3 | 0 | Q4WUB7 | SsDNA binding protein, putative              |        | core            |
| H072_8460        | 1 | 1 | 0 | C9S9J0 | Superoxide dismutase                         | CPSOD1 | core            |
| H072_9501        | 1 | 2 | 0 | C0S9X0 | Synaptobrevin                                |        | core            |
| H072_9252        | 2 | 1 | 0 | B6QND5 | Transformer-SR ribonucleoprotein             |        | core            |
| <b>H072_6884</b> | 2 | 2 | 0 | A6SFQ6 | Translation initiation factor 3 subunit B    |        | core            |
| H072_5716        | 1 | 1 | 0 | B0CYE6 | Translationally-controlled tumor protein     |        | core            |
| H072_1264        | 1 | 2 | 0 | Q4WZQ6 | Translocon-associated protein, alpha subunit |        | core            |
| <b>H072_4515</b> | 2 | 1 | 0 | F2T0M7 | Tyrosinase                                   |        | core            |
| H072_1932        | 1 | 1 | 0 | B8LVZ5 | Ubiquinol-cytochrome c reductase complex     |        | core            |
| H072_4699        | 1 | 1 | 0 | Q2ULC1 | Ubiquitin-like protein                       |        | core            |
| H072_251         | 1 | 1 | 0 | D5GA29 | Uroporphyrinogen decarboxylase               |        | core            |
| H072_333         | 1 | 1 | 0 | B2VXC9 | WLM domain containing protein                |        | core            |
| H072_9053        | 3 | 1 | 0 | B2VYM4 | von Willebrand domain containing protein     |        | core            |
| H072_8456        | 2 | 1 | 0 | C5FVD1 | Woronin body major protein                   | HEX1   | core            |
| H072_7321        | 1 | 1 | 0 | B6QLH9 | Yapsin, putative                             | SAP6   | core            |
| H072_10839       | 2 | 1 | 0 | A1CXU2 | YCII-related domain protein                  |        | core            |
| H072_8040        | 3 | 0 | 1 | -      | -                                            |        | ss <sup>g</sup> |
| H072_11421       | 1 | 0 | 1 | -      | -                                            |        | ls              |
| H072_2442        | 1 | 0 | 1 | -      | -                                            |        | ls              |
| H072_2849        | 1 | 0 | 1 | -      | -                                            |        | ss              |
| H072_4969        | 1 | 0 | 1 | -      | -                                            |        | ls              |
| H072_5071        | 2 | 0 | 1 | A1CNN3 | 3-isopropylmalate dehydrogenase              | LEU2   | core            |

|                  |    |   |   |        |                                                     |      |      |
|------------------|----|---|---|--------|-----------------------------------------------------|------|------|
| H072_7212        | 1  | 0 | 1 | Q0CA00 | 40S ribosomal protein S1                            |      | core |
| H072_4824        | 2  | 0 | 2 | Q2H733 | 40S ribosomal protein S14                           |      | core |
| H072_8904        | 2  | 0 | 2 | C1G810 | 40S ribosomal protein S4                            |      | core |
| H072_1819        | 1  | 0 | 2 | A7TI44 | 40S ribosomal protein S8                            |      | core |
| H072_4551        | 2  | 0 | 1 | C8VP37 | 5'-methylthioadenosine phosphorylase                |      | core |
| H072_8358        | 1  | 0 | 1 | G2XEJ2 | 60S ribosomal protein L10-B                         |      | core |
| H072_9155        | 2  | 0 | 2 | A7E5M3 | 60S ribosomal protein L2                            |      | core |
| H072_400         | 2  | 0 | 1 | E4UV03 | 60S ribosomal protein L23a                          |      | core |
| H072_1346        | 1  | 0 | 1 | B2VUF3 | 60S ribosomal protein L33                           |      | core |
| H072_3115        | 1  | 0 | 1 | E9EVG2 | 60S ribosomal protein L9                            |      | core |
| H072_4920        | 3  | 0 | 1 | A1DLW3 | Actin                                               |      | core |
| H072_9171        | 1  | 0 | 1 | G0S4P9 | Adenosine kinase-like protein                       |      | core |
| <b>H072_8285</b> | 1  | 0 | 1 | B2W768 | ADP-ribose pyrophosphatase                          |      | core |
| H072_10361       | 2  | 0 | 2 | A8NWX9 | ADP-ribosylation factor Arf1                        |      | core |
| H072_9057        | 1  | 0 | 1 | C0NAM8 | Alpha-mannosidase                                   |      | core |
| H072_2059        | 1  | 0 | 1 | B2WB98 | Aspartyl aminopeptidase                             |      | core |
| H072_3661        | 1  | 0 | 1 | Q8X213 | Beta-galactosidase                                  |      | core |
| H072_8897        | 10 | 0 | 4 | Q8X213 | Beta-galactosidase                                  |      | core |
| H072_4124        | 1  | 0 | 1 | Q1WMR7 | Beta-lactamase class C binding protein-like protein |      | core |
| H072_7033        | 2  | 0 | 1 | B8LYB6 | Cell division control protein Cdc48                 | PEX6 | core |
| H072_11288       | 1  | 0 | 2 | A0DNP7 | Chromosome undetermined scaffold_58                 |      | ls   |
| H072_6958        | 1  | 0 | 2 | F2SN81 | Cleavage and polyadenylation specific factor 5      |      | core |
| H072_4161        | 2  | 0 | 2 | C9SY92 | Copper transport protein ctr4                       |      | core |
| H072_11173       | 2  | 0 | 2 | Q4ING3 | Cytochrome c peroxidase, mitochondrial              |      | core |
| H072_1410        | 7  | 0 | 2 | D5GGN7 | Dihydrolipoyl dehydrogenase                         |      | core |
| H072_250         | 2  | 0 | 1 | C4JLH5 | Dipeptidyl-peptidase 5                              |      | core |

|            |   |   |   |        |                                                   |      |      |
|------------|---|---|---|--------|---------------------------------------------------|------|------|
| H072_7618  | 1 | 0 | 1 | E9EAV3 | DUF614 domain protein                             |      | core |
| H072_10773 | 6 | 0 | 2 | C0NAB0 | Enolase                                           |      | core |
| H072_2097  | 1 | 0 | 1 | A1CAU1 | Esterase, putative                                |      | core |
| H072_5189  | 5 | 0 | 1 | Q2US06 | F0F1-type ATP synthase                            | ssaN | core |
| H072_2712  | 1 | 0 | 1 | F2SC85 | Gamma-cysteine synthetase regulatory subunit      |      | core |
| H072_5254  | 1 | 0 | 1 | G2X076 | Glucan 1,3-beta-glucosidase                       |      | core |
| H072_9382  | 1 | 0 | 1 | E3Q9B8 | Glucose sorbosone dehydrogenase                   |      | core |
| H072_7720  | 1 | 0 | 1 | C5GQQ5 | Glucose transporter                               |      | core |
| H072_1348  | 1 | 0 | 1 | D5GIU9 | Glucose-6-phosphate 1-dehydrogenase               |      | core |
| H072_1331  | 1 | 0 | 1 | B8MNR3 | Glutamate carboxypeptidase, putative              |      | core |
| H072_6620  | 1 | 0 | 1 | A1CKI7 | Glutathione S-transferase GstA                    |      | core |
| H072_10870 | 2 | 0 | 1 | F0XM66 | GPI-anchored cell wall organization protein ecm33 |      | core |
| H072_4845  | 1 | 0 | 1 | C1MGF5 | Helicase                                          |      | core |
| H072_3332  | 3 | 0 | 3 | B6Q8V9 | High affinity zinc ion transporter, putative      |      | core |
| H072_10799 | 2 | 0 | 2 | A1CNS2 | Homoserine acetyltransferase family protein       |      | core |
| H072_9059  | 2 | 0 | 2 | E3Q4C4 | Hsp70-like protein                                |      | core |
| H072_8071  | 1 | 0 | 1 | A6SAG8 | Leukotriene A-4 hydrolase homolog                 |      | core |
| H072_7269  | 2 | 0 | 2 | A6SA55 | Malic enzyme                                      |      | core |
| H072_8642  | 1 | 0 | 1 | C1GPN6 | Membrane biogenesis protein Yop1                  |      | core |
| H072_10242 | 2 | 0 | 1 | Q4WQK0 | MFS transporter, putative                         |      | core |
| H072_2171  | 2 | 0 | 1 | A7EHB2 | Mitochondrial peroxiredoxin PRX1                  | TSA1 | core |
| H072_9406  | 2 | 0 | 2 | A7ELH5 | Mitochondrial processing peptidase beta subunit   |      | core |
| H072_1954  | 1 | 0 | 1 | E9DJ65 | Oxidoreductase                                    |      | core |
| H072_11032 | 1 | 0 | 1 | B6H9J0 | Pc16g11390 protein                                |      | core |
| H072_9235  | 1 | 0 | 1 | E5R1Z9 | Peroxiredoxin DOT5                                |      | core |
| H072_2638  | 1 | 0 | 1 | E3QLI7 | Pfs domain-containing protein                     |      | core |

|            |   |   |   |        |                                                          |           |      |
|------------|---|---|---|--------|----------------------------------------------------------|-----------|------|
| H072_5807  | 2 | 0 | 2 | A8N9Z6 | Pirin domain-containing protein                          |           | core |
| H072_4573  | 2 | 0 | 1 | B2AQR4 | Predicted CDS Pa_4_3430                                  |           | core |
| H072_6567  | 1 | 0 | 2 | Q4WFK4 | Probable 1,4-beta-D-glucan cellobiohydrolase             |           | core |
| H072_740   | 1 | 0 | 1 | Q8X077 | Probable proteasome subunit alpha type-2                 |           | core |
| H072_7191  | 1 | 0 | 1 | E3S7K9 | Probable Xaa-Pro aminopeptidase P                        |           | core |
| H072_3324  | 2 | 0 | 1 | B6QRG8 | Proteasome component Prs3, putative                      |           | core |
| H072_10716 | 1 | 0 | 1 | E3RUA8 | Proteasome subunit alpha type                            |           | core |
| H072_3320  | 1 | 0 | 1 | D5GBG2 | Proteasome subunit beta type                             |           | core |
| H072_8855  | 1 | 0 | 2 | B2WMI6 | Purine permease                                          |           | core |
| H072_7459  | 3 | 0 | 1 | C4YFN5 | Rab GDP-dissociation inhibitor                           |           | core |
| H072_4618  | 1 | 0 | 1 | B8MRE3 | RAS small monomeric GTPase Rab6                          | CLPT1     | core |
| H072_2692  | 1 | 0 | 2 | O93856 | Ras-like protein                                         | RAS1      | core |
| H072_2657  | 1 | 0 | 1 | Q6CFH4 | Ribose-5-phosphate isomerase                             |           | core |
| H072_5782  | 1 | 0 | 2 | C5JD38 | Ribosomal protein L7a                                    |           | core |
| H072_560   | 1 | 0 | 1 | C1GBD3 | RNP domain-containing protein                            |           | core |
| H072_5386  | 1 | 0 | 1 | B6K4U6 | S-adenosylmethionine synthetase                          | MGG_00383 | core |
| H072_8873  | 1 | 0 | 1 | E4ZH33 | Similar to 40S ribosomal protein S17                     |           | core |
| H072_3146  | 2 | 0 | 1 | E4ZLT6 | Similar to delta 1-pyrroline-5-carboxylate dehydrogenase |           | core |
| H072_10966 | 1 | 0 | 1 | E4ZWH5 | Similar to DUF814 domain-containing protein              |           | core |
| H072_8300  | 7 | 0 | 3 | E5A5S8 | Similar to fatty acid oxygenase                          | PPOA      | core |
| H072_10791 | 2 | 0 | 2 | G2YT91 | Similar to peptidase                                     |           | core |
| H072_5468  | 2 | 0 | 1 | G2Y7Z4 | Similar to proteasome subunit alpha type 1               |           | core |
| H072_3012  | 1 | 0 | 1 | G2Y153 | Similar to ras-related protein ypt1                      | CLPT1     | core |
| H072_2935  | 2 | 0 | 2 | G2Y4X7 | Similar to tyrosinase                                    |           | core |
| H072_5183  | 1 | 0 | 1 | D5MTF9 | Succinate dehydrogenase subunit A                        |           | core |
| H072_9165  | 1 | 0 | 2 | C4JNC6 | Succinyl-CoA ligase alpha-chain                          |           | core |



|                   |   |   |   |        |                                                             |              |      |
|-------------------|---|---|---|--------|-------------------------------------------------------------|--------------|------|
| H072_6019         | 1 | 0 | 1 | B0DN92 | Thioredoxin                                                 |              | core |
| H072_6985         | 2 | 0 | 1 | C5JW14 | Transcription factor RfeF                                   |              | core |
| H072_1506         | 1 | 0 | 1 | Q0CN96 | Tubulin alpha-1 chain                                       | beta-tubulin | core |
| H072_9647         | 1 | 0 | 1 | E9EUM6 | Urea transporter                                            |              | core |
| H072_9474         | 3 | 0 | 2 | A7EJU4 | Vacuolar ATP synthase subunit E                             |              | core |
| H072_1656         | 3 | 2 | 4 | -      | -                                                           |              | ls   |
| <b>H072_11515</b> | 7 | 4 | 4 | -      | -                                                           |              | ls   |
| H072_10061        | 4 | 2 | 4 | A6S5A2 | 14-3-3 protein                                              |              | core |
| H072_1296         | 1 | 1 | 1 | C5FLK4 | 2,3-bisphosphoglycerate-independent phosphoglycerate mutase |              | core |
| H072_9511         | 7 | 1 | 1 | C5NZN9 | 2-methylcitrate dehydratase, putative                       |              | core |
| H072_5591         | 2 | 3 | 2 | C5P2T9 | 40S ribosomal protein S15, putative                         |              | core |
| H072_613          | 3 | 3 | 2 | E9F0G2 | 40S ribosomal protein S18                                   |              | core |
| H072_1619         | 1 | 1 | 1 | A7E5C7 | 40S ribosomal protein S19                                   |              | core |
| H072_4705         | 2 | 1 | 1 | Q86ZG1 | 40S ribosomal protein S24                                   |              | core |
| H072_10413        | 1 | 3 | 3 | E9CZU1 | 40S ribosomal protein S3                                    |              | core |
| H072_2214         | 1 | 1 | 1 | F0X7C8 | 40S ribosomal protein s5                                    |              | core |
| H072_10410        | 3 | 2 | 1 | G3JBG0 | 40S ribosomal protein S7                                    |              | core |
| H072_9617         | 4 | 2 | 1 | C5JCK9 | 40S ribosomal protein S9                                    |              | core |
| <b>H072_3423</b>  | 7 | 4 | 3 | C8VMU4 | 4-aminobutyrate aminotransferase                            |              | core |
| H072_297          | 2 | 1 | 2 | A7E5G0 | 60S ribosomal protein L1                                    |              | core |
| H072_11562        | 2 | 1 | 1 | F2SCD3 | 60S ribosomal protein L26                                   |              | core |
| H072_5408         | 1 | 2 | 3 | F2S9H0 | 60S ribosomal protein L35                                   |              | core |
| H072_758          | 3 | 4 | 4 | E3KFB8 | 60S ribosomal protein L40                                   |              | core |
| H072_10336        | 3 | 2 | 2 | C1GY65 | 60S ribosomal protein L6                                    |              | core |
| H072_7449         | 3 | 4 | 2 | Q4W9S6 | 60S ribosomal protein L7                                    |              | core |
| H072_8772         | 3 | 2 | 3 | B6GWT7 | 6-phosphogluconate dehydrogenase, decarboxylating           |              | core |

|                   |    |   |   |        |                                               |         |      |
|-------------------|----|---|---|--------|-----------------------------------------------|---------|------|
| H072_10403        | 6  | 4 | 3 | A1D489 | ADP,ATP carrier protein                       |         | core |
| H072_111          | 1  | 1 | 1 | C0NKH9 | ADP-ribosylation factor                       |         | core |
| H072_11540        | 15 | 3 | 3 | P40108 | Aldehyde dehydrogenase                        |         | core |
| H072_2170         | 1  | 1 | 1 | A1CHK2 | Aldose 1-epimerase, putative                  |         | core |
| H072_11516        | 7  | 3 | 4 | C1GDQ9 | Alkaline phosphatase                          |         | core |
| H072_6410         | 2  | 1 | 1 | D8DUI6 | Alpha-1,6-glucosidase, pullulanase-type       |         | core |
| H072_10095        | 2  | 1 | 1 | Q9HG00 | Alpha-galactosidase                           |         | core |
| <b>H072_4639</b>  | 14 | 4 | 2 | C8V659 | Aminopeptidase                                |         | core |
| H072_3011         | 4  | 1 | 2 | Q4WEV5 | Aminopeptidase, putative                      |         | core |
| <b>H072_9479</b>  | 3  | 4 | 2 | E9EJ64 | ATP synthase D chain                          |         | core |
| <b>H072_940</b>   | 7  | 4 | 3 | C1GIF6 | ATP synthase subunit 5                        |         | core |
| H072_9367         | 16 | 4 | 4 | F0XTF0 | ATP synthase subunit beta                     | ssaN    | core |
| H072_7513         | 7  | 3 | 3 | C5JQV8 | ATP-dependent molecular chaperone HSC82       | HSP90   | core |
| H072_227          | 2  | 1 | 2 | A1CJT5 | ATP-dependent RNA helicase eIF4A              | VAD1    | core |
| H072_8474         | 8  | 4 | 4 | B6QEB0 | Autophagic serine protease Alp2               |         | core |
| H072_7037         | 1  | 1 | 1 | E9DJF7 | Beta-1,3-glucanosyltransferase                | GAS1    | core |
| <b>H072_10514</b> | 6  | 4 | 4 | A7F2T8 | Brt1                                          |         | core |
| H072_6432         | 2  | 1 | 1 | E9DY83 | Calcofluor white hypersensitive protein       |         | ls   |
| H072_5152         | 6  | 2 | 2 | B2WDE1 | Calreticulin                                  |         | core |
| H072_1143         | 2  | 1 | 2 | G2QFL8 | Carbohydrate-binding module family 48 protein |         | core |
| <b>H072_11104</b> | 4  | 2 | 1 | F2PH15 | Carboxypeptidase                              | um01888 | core |
| <b>H072_4030</b>  | 5  | 3 | 2 | B6HPP6 | Carboxypeptidase Y homolog A                  | um01886 | core |
| <b>H072_6416</b>  | 7  | 4 | 2 | C8VRG6 | Carnitine acetyl transferase                  |         | core |
| H072_1531         | 5  | 1 | 2 | C5JTH3 | Chaperonin GroL                               |         | core |
| H072_3717         | 9  | 1 | 4 | C0NIW4 | Cobalamin-independent methionine synthase     | MSY1    | core |
| H072_8961         | 2  | 3 | 1 | C8VCM2 | Cyanate hydratase                             |         | core |

|                  |    |   |   |        |                                               |        |      |
|------------------|----|---|---|--------|-----------------------------------------------|--------|------|
| H072_512         | 1  | 1 | 1 | E3QDN0 | DJ-1/PfpI family protein                      |        | core |
| <b>H072_6484</b> | 14 | 4 | 4 | A6RVB0 | DnaK-type molecular chaperone BiP             |        | core |
| H072_283         | 4  | 4 | 1 | Q873Z5 | Elongation factor 1 beta subunit              |        | core |
| H072_2534        | 9  | 3 | 3 | Q96X45 | Elongation factor 2                           |        | core |
| H072_8326        | 14 | 2 | 3 | B2VV92 | Endothelin-converting enzyme 1                |        | core |
| H072_3998        | 1  | 1 | 1 | B0Y8Q4 | FKBP-type peptidyl-prolyl isomerase, putative | BcPIC5 | core |
| <b>H072_4602</b> | 9  | 4 | 3 | Q4WY39 | Fructose-bisphosphate aldolase, class II      |        | core |
| H072_2750        | 3  | 1 | 1 | E5R0W2 | Fumarylacetoacetase                           |        | core |
| H072_5604        | 7  | 1 | 3 | F9XAN5 | Glucokinase                                   | HXK1   | core |
| H072_2327        | 5  | 3 | 3 | C5GQQ5 | Glucose transporter                           | FRT1   | core |
| H072_6630        | 6  | 3 | 1 | C6HB15 | Glutaminase A                                 |        | core |
| H072_1102        | 3  | 3 | 3 | Q873E8 | Glutathione reductase                         |        | core |
| <b>H072_6664</b> | 2  | 1 | 2 | B2W2A7 | Glutathione S-transferase                     |        | core |
| <b>H072_7628</b> | 5  | 2 | 1 | Q2UAA3 | Glutathione S-transferase                     |        | core |
| H072_6088        | 4  | 1 | 3 | Q6B960 | Glyceraldehyde 3-phosphate dehydrogenase      |        | core |
| H072_2385        | 4  | 2 | 3 | D4DGP3 | Glycosyl hydrolase, putative                  |        | core |
| H072_8798        | 1  | 1 | 1 | F0XIB2 | GPI anchored cell wall protein                |        | core |
| H072_8801        | 1  | 1 | 3 | F0XIB2 | GPI anchored cell wall protein                |        | core |
| H072_8797        | 5  | 4 | 4 | F0XIB2 | GPI anchored cell wall protein                |        | core |
| H072_3286        | 1  | 1 | 4 | B1NNU0 | GPI anchored CFEM domain protein              |        | ls   |
| H072_10064       | 3  | 3 | 3 | B1NNT9 | GPI anchored CFEM domain protein              |        | ls   |
| H072_8802        | 3  | 1 | 2 | E9F4I8 | GPI anchored protein, putative                |        | core |
| H072_5177        | 3  | 2 | 3 | A1C3X6 | GPI anchored protein, putative                |        | ls   |
| H072_4162        | 1  | 3 | 2 | E9F4I8 | GPI anchored protein, putative                |        | core |
| H072_2629        | 5  | 3 | 1 | G2WQ85 | Heat shock protein                            |        | core |
| H072_9974        | 7  | 4 | 4 | C8VJN8 | Histone H1                                    |        | core |

|                   |    |   |   |        |                                                    |      |      |
|-------------------|----|---|---|--------|----------------------------------------------------|------|------|
| H072_6094         | 1  | 4 | 3 | P04909 | Histone H2A-alpha                                  |      | core |
| H072_6093         | 8  | 4 | 4 | D5G562 | Histone H2B                                        |      | core |
| H072_4460         | 2  | 3 | 4 | F9XD44 | Histone H3                                         |      | core |
| H072_4461         | 6  | 4 | 4 | P04914 | Histone H4                                         |      | core |
| H072_5895         | 6  | 4 | 4 | Q76MU7 | Histone H4                                         |      | core |
| H072_3464         | 3  | 1 | 1 | B8MGP9 | HMG box protein, putative                          |      | ls   |
| H072_1514         | 15 | 4 | 4 | C1GLI2 | Hsp70-like protein                                 |      | core |
| H072_3209         | 10 | 3 | 4 | C5GFP7 | Immunogenic protein                                |      | core |
| H072_1384         | 1  | 1 | 1 | D2JY86 | Initiation factor 5a                               |      | core |
| H072_1583         | 1  | 4 | 2 | B2W290 | Integral membrane protein                          |      | core |
| H072_684          | 3  | 1 | 1 | B8M2D7 | Isocitrate dehydrogenase, NAD-dependent            | LEU2 | core |
| <b>H072_10483</b> | 3  | 2 | 1 | G0ZGS9 | Isopentenyl-diphosphate isomerase                  |      | core |
| H072_5292         | 1  | 2 | 1 | A6YIY0 | Major ampullate spidroin 2                         |      | core |
| H072_10207        | 11 | 2 | 4 | Q7ZA65 | Malate dehydrogenase                               |      | core |
| H072_4910         | 4  | 1 | 3 | B8MTP1 | Malate dehydrogenase, NAD-dependent                |      | core |
| H072_9486         | 2  | 1 | 1 | B8M532 | Malate synthase AcuE                               | MLS1 | core |
| H072_5154         | 10 | 3 | 3 | Q0CT17 | Methylmalonate-semialdehyde dehydrogenase          |      | core |
| H072_5302         | 2  | 1 | 2 | Q4WQ50 | Mn superoxide dismutase SodB                       | SOD2 | core |
| H072_3247         | 1  | 2 | 3 | Q5G5B5 | Mucin-like protein                                 |      | core |
| H072_7115         | 1  | 1 | 2 | A1C671 | NAD dependent epimerase/dehydratase family protein |      | core |
| H072_6117         | 2  | 1 | 4 | C1GGT1 | Naringenin 3-dioxygenase                           |      | core |
| <b>H072_4754</b>  | 2  | 3 | 3 | C4JZ26 | Nonhistone chromosomal protein 6A                  | MNH6 | core |
| <b>H072_8576</b>  | 9  | 4 | 4 | A4QSA2 | Nucleoside diphosphate kinase                      |      | core |
| H072_1095         | 7  | 4 | 4 | F2TUB3 | Outer mitochondrial membrane protein porin 1       |      | core |
| H072_9845         | 6  | 2 | 2 | A1D617 | Palmitoyl-protein thioesterase                     |      | core |
| H072_3494         | 7  | 3 | 4 | Q5ASX5 | Peptidyl-prolyl cis-trans isomerase                | CPA1 | core |

|                   |    |   |   |        |                                                       |           |      |
|-------------------|----|---|---|--------|-------------------------------------------------------|-----------|------|
| H072_8871         | 2  | 4 | 2 | B4VX45 | Peptidyl-prolyl cis-trans isomerase, FKBP-type        | BcPIC5    | core |
| H072_10420        | 1  | 1 | 1 | E7R805 | Peptidylprolyl-cis/trans-isomerase                    |           | core |
| H072_8            | 7  | 1 | 2 | A1DAN6 | Phosphate-repressible phosphate permease              |           | core |
| H072_7752         | 1  | 1 | 3 | A1DM57 | Phosphomannomutase                                    |           | core |
| H072_7290         | 8  | 3 | 3 | C5JTE5 | Plasma membrane ATPase                                | PMR1      | core |
| H072_10672        | 3  | 4 | 4 | D4NXD9 | Poly-ubiquitin                                        |           | core |
| <b>H072_7877</b>  | 11 | 4 | 4 | Q2TXY5 | Predicted protein                                     |           | ls   |
| H072_8183         | 3  | 1 | 3 | Q5USB0 | Profilin-like protein                                 |           | core |
| <b>H072_1780</b>  | 14 | 4 | 4 | B2W8Q8 | Protein disulfide-isomerase                           |           | core |
| <b>H072_11591</b> | 3  | 1 | 1 | C9SWZ1 | Putative uncharacterized protein                      |           | core |
| H072_6859         | 7  | 4 | 4 | E3S5J5 | Putative uncharacterized protein                      |           | core |
| <b>H072_8078</b>  | 5  | 4 | 4 | A1D8M5 | Putative uncharacterized protein                      |           | core |
| <b>H072_6761</b>  | 8  | 4 | 3 | E3QM16 | Quinone oxidoreductase                                |           | core |
| H072_806          | 4  | 2 | 2 | E3QPZ4 | Ras family protein                                    | CLPT1     | core |
| H072_1995         | 1  | 4 | 3 | B2W104 | Retrograde transporter                                |           | core |
| H072_2182         | 2  | 2 | 2 | Q2TXA3 | RIB40 DNA, SC010                                      |           | core |
| H072_812          | 4  | 3 | 2 | E3QDU7 | Ribosomal L22e family protein                         |           | core |
| H072_8438         | 2  | 2 | 3 | E3QT71 | Ribosomal protein L18                                 |           | core |
| H072_1429         | 6  | 2 | 2 | E3QA16 | RNA recognition domain-containing protein             |           | core |
| H072_1800         | 2  | 1 | 1 | D5GBM8 | Serine hydroxymethyltransferase                       |           | core |
| H072_4069         | 4  | 1 | 3 | E3QHC9 | Short chain dehydrogenase                             | Mdh1      | core |
| <b>H072_9515</b>  | 5  | 2 | 2 | E9EAF9 | Short-chain dehydrogenase/reductase family            | MGG_00056 | core |
| H072_2823         | 8  | 4 | 4 | G2YTP4 | Similar to 14-3-3 protein                             |           | core |
| H072_1894         | 11 | 1 | 4 | G2YDI7 | Similar to 3-oxoacyl-(Acyl-carrier-protein) reductase | THR1      | core |
| H072_10253        | 3  | 4 | 3 | E4ZUZ7 | Similar to 60s acidic ribosomal protein               |           | core |
| H072_11308        | 6  | 3 | 2 | G7X964 | Similar to An01g05370                                 |           | core |

|                  |    |   |   |        |                                                                      |           |
|------------------|----|---|---|--------|----------------------------------------------------------------------|-----------|
| H072_4898        | 6  | 3 | 3 | E5A7F8 | Similar to elongation factor 1-gamma                                 | core      |
| H072_10868       | 1  | 2 | 1 | E4ZVM0 | Similar to fumarylacetoacetate hydrolase domain-containing protein 1 | core      |
| H072_2522        | 1  | 3 | 2 | E5A638 | Similar to glycolipid transfer protein HET-C2                        | core      |
| H072_1471        | 1  | 1 | 1 | F2T6A3 | Small nuclear ribonucleoprotein Sm D3                                | core      |
| <b>H072_5601</b> | 4  | 4 | 4 | C9SD45 | Spherulin-1A                                                         | core      |
| H072_1786        | 3  | 3 | 2 | E9E1Q2 | Sphingolipid long chain base-responsive protein PIL1                 | core      |
| H072_5132        | 2  | 3 | 4 | F2S9K7 | Structural toxin protein RtxA                                        | core      |
| H072_10037       | 2  | 2 | 1 | F0X9V8 | Subtilisin-like protease                                             | core      |
| H072_7045        | 5  | 1 | 3 | C5PFN7 | Succinyl-CoA:3-ketoacid-coenzyme A transferase                       | core      |
| H072_10021       | 5  | 4 | 4 | Q9Y783 | Superoxide dismutase                                                 | SOD2 core |
| H072_2181        | 1  | 1 | 1 | F2STR3 | Syntaxin                                                             | core      |
| H072_6843        | 5  | 3 | 1 | E3Q9F0 | Tannase and feruloyl esterase                                        | core      |
| H072_1708        | 1  | 2 | 2 | F2PKU8 | Telomere and ribosome associated protein Stm1                        | core      |
| H072_3033        | 4  | 3 | 1 | E4V0A3 | Thioredoxin domain-containing protein                                | core      |
| <b>H072_5104</b> | 8  | 4 | 4 | Q6C7L4 | Thioredoxin reductase                                                | core      |
| H072_1118        | 2  | 3 | 1 | C5NZ58 | TPR Domain containing protein                                        | core      |
| <b>H072_6506</b> | 19 | 4 | 4 | D5G4P9 | Transaldolase                                                        | core      |
| H072_7551        | 2  | 4 | 4 | B6JZ05 | Transcription factor tau subunit sfc4                                | core      |
| H072_10376       | 3  | 2 | 2 | F0XLR6 | Transketolase                                                        | core      |
| H072_4738        | 5  | 2 | 3 | A1D3Y8 | Translation elongation factor EF-1 alpha                             | core      |
| H072_1444        | 3  | 1 | 1 | E3S053 | Triosephosphate isomerase                                            | core      |
| <b>H072_6869</b> | 3  | 4 | 2 | C1HDY0 | Tropomyosin-1                                                        | core      |
| H072_8125        | 4  | 2 | 1 | C5JXN6 | Tyrosinase                                                           | core      |
| H072_4094        | 3  | 4 | 4 | B0CQN3 | Ubiquitin                                                            | core      |
| H072_9895        | 3  | 4 | 4 | A7E993 | Ubiquitin fusion protein                                             | core      |
| <b>H072_6217</b> | 5  | 4 | 1 | A1C4U0 | Vacuolar aspartyl aminopeptidase Lap4                                | core      |

|                  |    |   |   |        |                     |         |      |
|------------------|----|---|---|--------|---------------------|---------|------|
| <b>H072_3605</b> | 14 | 4 | 4 | E9EY37 | Vacuolar protease A | ugt51E1 | core |
|------------------|----|---|---|--------|---------------------|---------|------|

---

15

16 <sup>a</sup> Gene models matching the peptide sequences. Models in bold were considered to be significantly upregulated in knobs (see Table 1).

17

18 <sup>b</sup> Number of unique peptides matching a single protein.

19

20 <sup>c</sup> Number of replicates that the protein was found in.

21

22 <sup>d</sup> Hits of the gene model in the Uniprot database (1). Searches were performed using the Blastp algorithm (2) with an e-value threshold of 1e-10. Fungal  
23 sequences are shown among the top hits.

24

25 <sup>e</sup> Homologs of the gene model identified in the pathogen–host interaction (PHI) protein database (3).

26

27 <sup>f</sup> Indicated if the gene model is shared with other fungi (core), shared between *M. haptotylum* and *A. oligospora* (lineage specific, ls) or unique in *M. haptotylum*  
28 (species specific, ss) (T. Meerupati, K-M. Andersson, E. Friman, D. Kumar, A. Tunlid, and D. Ahrén, submitted for publication).

29

30 <sup>g</sup> Protein that is an orphan, e.i. they had no homologues in the NCBI database (4) and lacked Pfam domains (5).

31 **TABLE S2** Features of all proteins with the Pfam domain WSC in *Monacrosporium haptotylum*

| ID         | Proteome <sup>a</sup> | Transcriptome <sup>b</sup> | Exp <sup>c</sup> | Length (aa) | Sec <sup>d</sup> | O-Glyc <sup>e</sup> | N-Glyc <sup>e</sup> | TM <sup>f</sup> | RADAR <sup>g</sup> |
|------------|-----------------------|----------------------------|------------------|-------------|------------------|---------------------|---------------------|-----------------|--------------------|
| H072_10205 | up                    | up                         | ■                | 559         | SiP              | 55                  | 2                   | -               | 130 (4)            |
| H072_6833  | up                    | up                         | ■                | 999         | SiP              | 156                 | 3                   | -               | 804 (14)           |
| H072_6835  | up                    | up                         | ■                | 392         | SiP              | 1                   | 2                   | -               | 85 (3)             |
| H072_8804  | up                    | up                         | ■                | 546         | SiP              | 50                  | 1                   | -               | 113 (5)            |
| H072_973   | up                    | up                         | ■                | 877         | SiP*             | 60                  | 4                   | -               | 737 (9)            |
| H072_10940 | iden                  | up                         | ■                | 330         | SiP              | 15                  | -                   | -               | 106 (3)            |
| H072_5095  | iden                  | up                         | ■                | 772         | SiP              | 29                  | 1                   | -               | 438 (6)            |
| H072_22    |                       | up                         | ■                | 313         | SiP              | 9                   | -                   | -               | 198 (3)            |
| H072_4229  |                       | up                         | ■                | 828         | SiP              | 113                 | 3                   | -               | 641 (10)           |
| H072_4501  |                       | up                         | ■                | 492         | SiP              | 70                  | 3                   | -               | 342 (5)            |
| H072_4641  |                       | up                         | ■                | 223         | SiP              | 1                   | -                   | -               | 176 (3)            |
| H072_4974  |                       | up                         | ■                | 330         | SiP              | 10                  | 2                   | -               | 104 (2)            |
| H072_694   |                       | up                         | ■                | 271         | SiP              | -                   | -                   | -               | 142 (4)            |
| H072_10165 |                       |                            | ■                | 1263        | SiP              | 95                  | 9                   | -               | 370 (4)            |
| H072_10524 |                       |                            | ■                | 320         | SiP              | 37                  | 1                   | -               | 118 (4)            |
| H072_10626 |                       |                            | ■                | 2282        | SiP              | 181                 | 12                  | -               | 398 (10)           |
| H072_10675 |                       |                            | ■                | 920         | -                | 16                  | 4                   | 7               | 128 (2)            |
| H072_10905 |                       |                            | ■                | 3063        | SiP              | 28                  | 6                   | -               | 3103 (47)          |
| H072_1433  |                       |                            | ■                | 386         | -                | 43                  | 3                   | 2               | 89 (3)             |
| H072_1809  |                       |                            | ■                | 1581        | SiP              | 93                  | 10                  | -               | 1023 (11)          |
| H072_196   |                       |                            | ■                | 1159        | SiP              | 2                   | 1                   | -               | 738 (6)            |
| H072_2046  |                       |                            | ■                | 1836        | SiP              | 271                 | 11                  | -               | 456 (10)           |
| H072_2543  |                       |                            | ■                | 1142        | -                | 81                  | 7                   | -               | 295 (8)            |
| H072_311   |                       |                            | ■                | 849         | SiP              | 47                  | -                   | -               | 153 (3)            |
| H072_4477  |                       |                            | ■                | 364         | SiP              | -                   | 5                   | -               | 101 (3)            |
| H072_4490  |                       |                            | ■                | 643         | SiP              | 100                 | 1                   | -               | 205 (6)            |
| H072_5385  |                       |                            | ■                | 1102        | SiP              | 60                  | 5                   | -               | 995 (11)           |
| H072_654   |                       |                            | ■                | 414         | SiP              | 43                  | -                   | -               | 362 (3)            |
| H072_6644  |                       |                            | ■                | 2659        | SiP              | 237                 | 16                  | -               | 1625 (11)          |
| H072_7616  |                       |                            | ■                | 2882        | SiP*             | 90                  | 7                   | -               | 2814 (29)          |
| H072_7637  |                       |                            | ■                | 727         | SiP              | 14                  | 1                   | -               | 501 (3)            |
| H072_8090  |                       |                            | ■                | 1707        | SiP              | 211                 | 3                   | -               | 496 (10)           |
| H072_8104  |                       |                            | ■                | 1279        | SiP*             | 483                 | 6                   | -               | 537 (5)            |

33

34

35

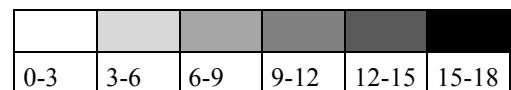



36 <sup>a</sup> Proteins identified using mass spectrometry. “up” denotes protein that was at least two-fold upregulated in knobs  
37 versus mycelia. “iden” indicates proteins that were uniquely identified in knobs.

38

39 <sup>b</sup> “up” indicates gene that was more than two-fold upregulated (infected hyphae versus knob,  $P < 0.01$ ) in the  
40 transcriptome (T. Meerupati, K-M. Andersson, E. Friman, D. Kumar, A. Tunlid, and D. Ahrén, submitted for  
41 publication).

42

43 <sup>c</sup> “Exp” denotes the total transcriptional normalized expression levels ( $\log_2$  values) according to the scale.

44

45 <sup>d</sup> “SiP” indicates that the protein has a predicted secretion signal using the SignalP 4.1 server (6), asterisk indicates  
46 protein with GPI anchor signal using PredGPI (7).

47

48 <sup>e</sup> Number of *O*- and *N*-glycosylation sites using NetOGlyc 3.1 (8) and NetNGlyc 1.0  
49 (<http://www.cbs.dtu.dk/services/NetNGlyc/>).

50

51 <sup>f</sup> Number of transmembrane (TM) regions predicted using Phobius (9).

52

53 <sup>g</sup> Max score and in brackets the number of repeats using RADAR (10).

54

55

56

57

58

59

60

61

62

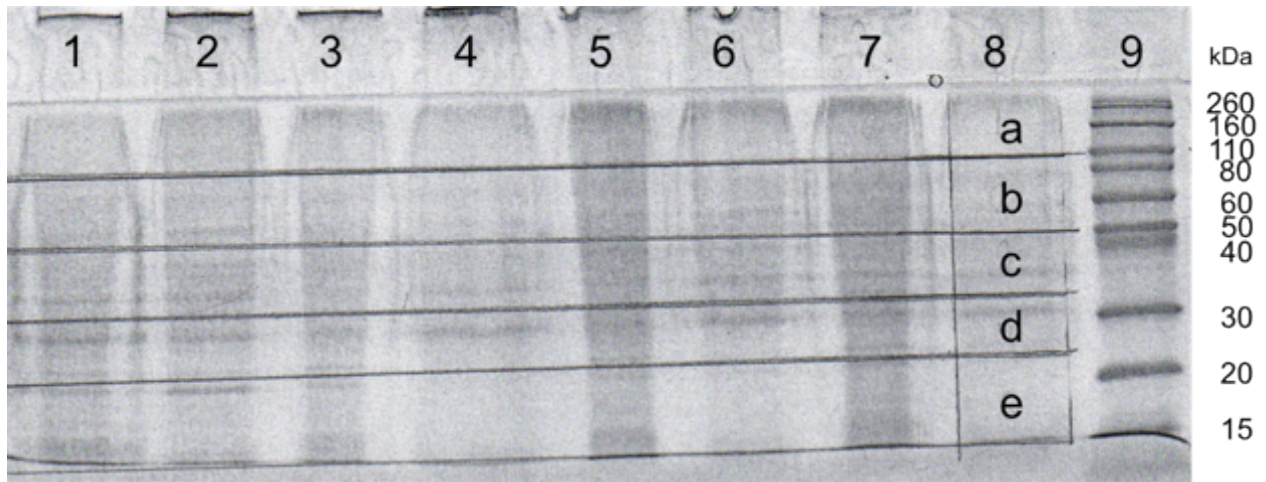

63  
 64 **FIG S1** SDS-PAGE analysis of the proteins extracted from mycelia and knobs of *M. haptotylum*.  
 65 Lane 1, 3, 5 and 7 are replicates from mycelia and lane 2, 4, 6 and 8 are replicates from knob.  
 66 Lane 9 is the molecular weight marker. Following electrophoresis and staining each lane was cut  
 67 into five slices (a-e).

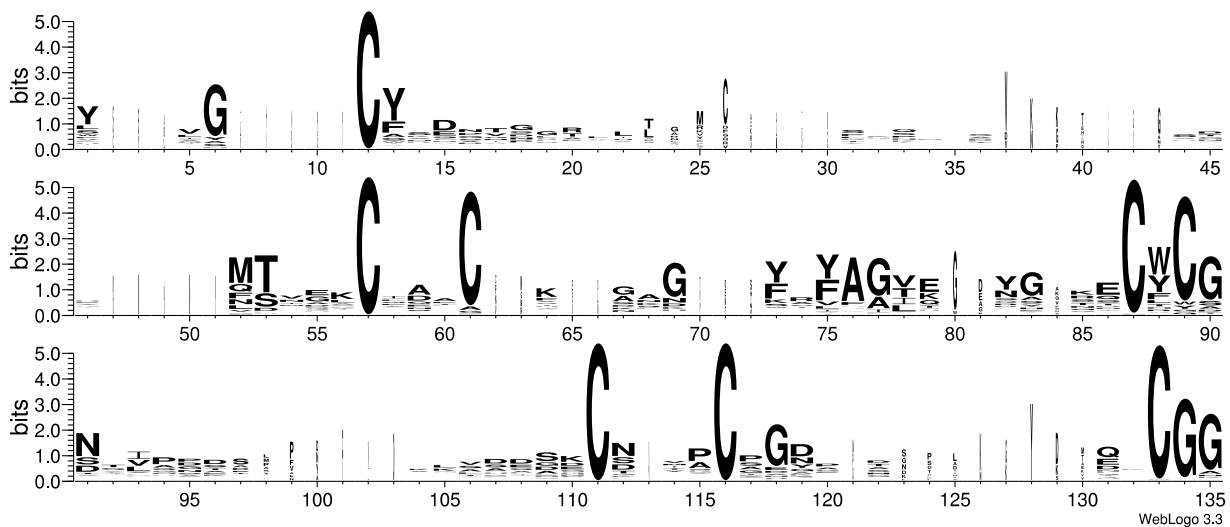

70  
 71 **FIG S2** Sequence logo of the WSC domain. The logo was derived from the alignment that Fig. 3  
 72 is based on. The prevalence of amino acids at specific positions is shown. The sequence logo was  
 73 created with WebLogo version 3.3 (11).

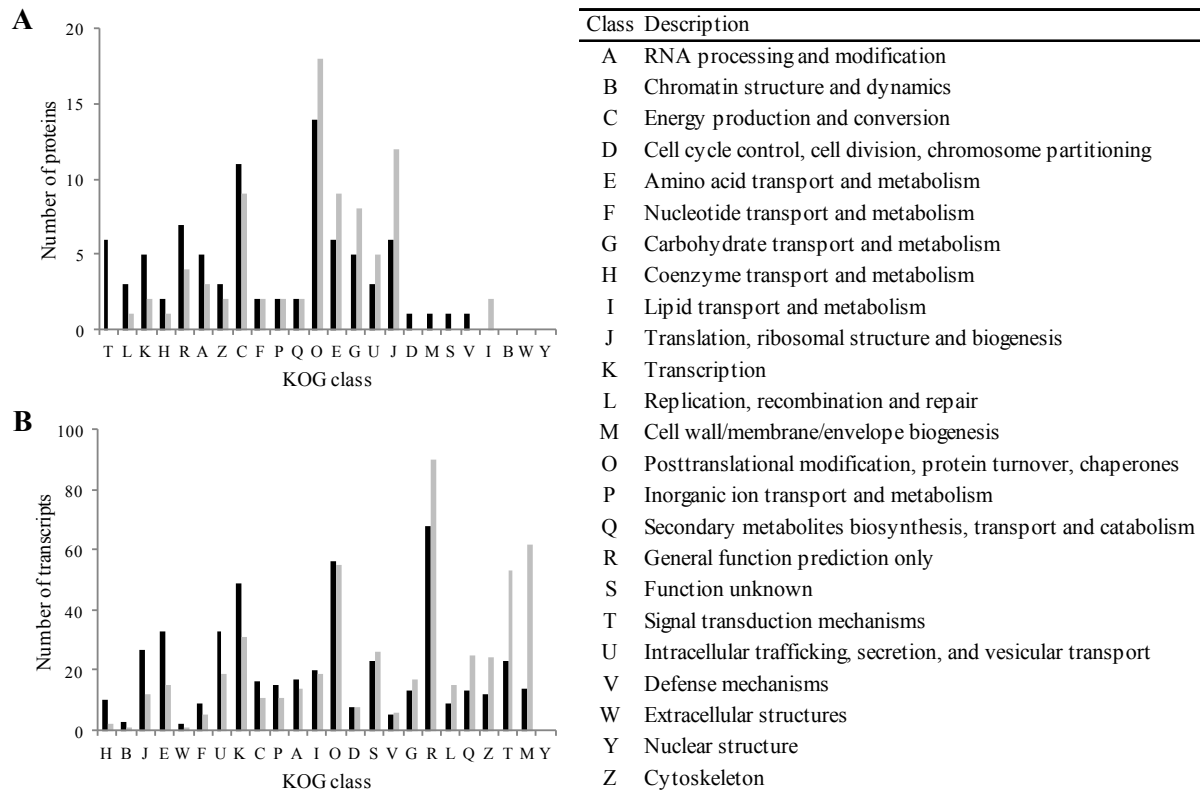

75

76 **FIG S3** Distribution of proteins and transcripts in different KOG categories in the knobs (black  
 77 bars) and mycelia (grey bars) of *Monacrosporium haptotylum*. The categories are listed in  
 78 descending order of enrichment in the knobs, i.e. the categories with the highest values of the  
 79 ratio of abundance in knobs versus mycelia are found to the left of the figures. (A) KOG  
 80 categories in the proteome. The total number of proteins that were mapped to KOG categories  
 81 was 82 and 86 for knobs and mycelia, respectively. The data include both the significantly  
 82 upregulated proteins and the proteins that were uniquely present in either knobs or mycelia. (B)  
 83 KOG categories in the transcriptome. A total of 478 genes were upregulated and mapped to a  
 84 KOG category in knobs and 522 were upregulated and mapped to a KOG category in mycelia.

85

86

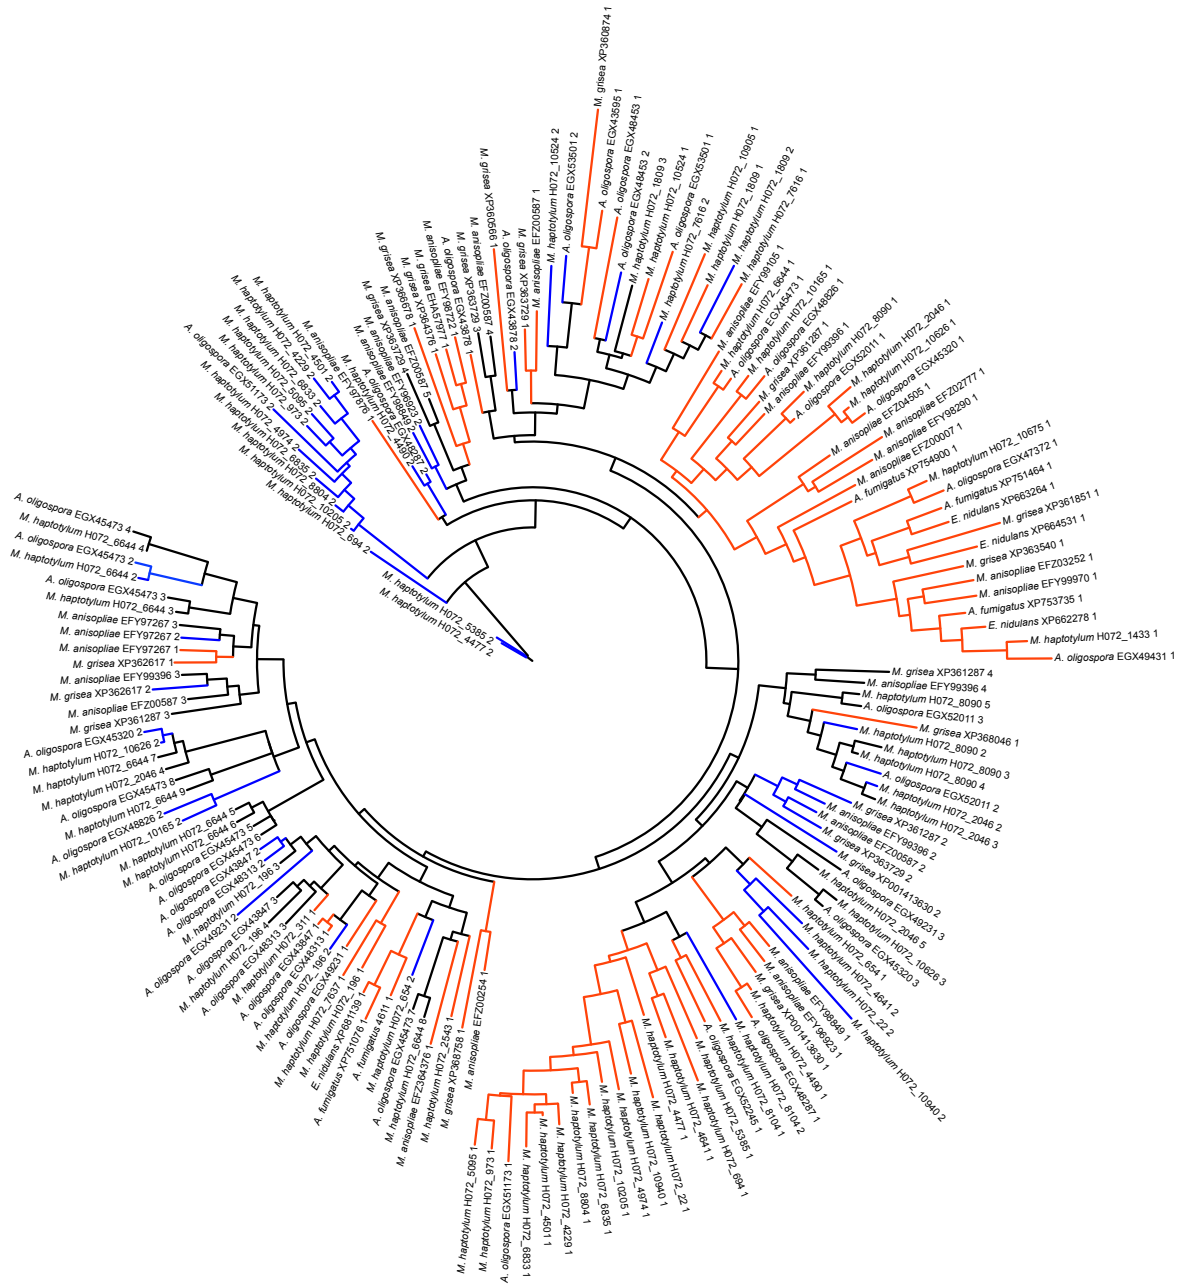

87

88 **FIG S4** Phylogeny of 173 WSC Pfam domains from six fungal genomes. Branches of the first  
 89 WSC domain counted from the N-terminus in each protein are colored in red. Branches of the  
 90 second WSC domain in each protein are colored in blue. The number following each protein ID  
 91 refers to the order of the Pfam domain in the protein counted from the N-terminus. Proteins  
 92 containing the WSC domain were retrieved from the genomes of *Monacrosporium haptotylum*

93 (33 proteins) (T. Meerupati, K-M. Andersson, E. Friman, D. Kumar, A. Tunlid, and D. Ahrén,  
94 submitted for publication), *Arthrotrrys oligospora* (16 proteins) (12), *Metarhizium anisopliae*  
95 (16 proteins) (13), *Aspergillus fumigatus* (5 proteins) (14), *Emericella nidulans* (4 proteins) (15)  
96 and *Magnaporthe grisea* (13 proteins) (16). In total, 87 sequences were retrieved and regions  
97 corresponding to 173 WSC domains were extracted using the extractseq program from the  
98 EMBOSS package (17). Sequences was aligned using the MAFFT multiple alignment program  
99 (18). An unrooted maximum likelihood (ML) tree was reconstructed from the 173 WSC domains  
100 using PhyML 3.0 version (19). The phylogenetic tree was visualized in iTOL (20).

101

102

103

104

105

106

107

108

109

110

111

112

113

114

References

- 115
- 116
- 117 1. **Apweiler R, Bairoch A, Wu CH, Barker WC, Boeckmann B, Ferro S, Gasteiger E,**  
118 **Huang HZ, Lopez R, Magrane M, Martin MJ, Natale DA, O'Donovan C, Redaschi N,**  
119 **Yeh LSL.** 2004. UniProt: the Universal Protein knowledgebase. *Nucleic Acids Res.*  
120 **32:115-119.**
- 121 2. **Altschul SF, Gish W, Miller W, Myers EW, Lipman DJ.** 1990. Basic local alignment  
122 search tool. *J. Mol. Biol.* **215:403-410.**
- 123 3. **Winnenburg R, Urban M, Beacham A, Baldwin TK, Holland S, Lindeberg M, Hansen**  
124 **H, Rawlings C, Hammond-Kosack KE, Kohler J.** 2008. PHI-base update: additions to  
125 the pathogen-host interaction database. *Nucleic Acids Res.* **36:572-576.**
- 126 4. **Benson DA, Karsch-Mizrachi I, Lipman DJ, Ostell J, Sayers EW.** 2009. GenBank.  
127 *Nucleic Acids Res.* **37:D26-D31.**
- 128 5. **Finn RD, Mistry J, Tate J, Coggill P, Heger A, Pollington JE, Gavin OL, Gunasekaran**  
129 **P, Ceric G, Forslund K, Holm L, Sonnhammer ELL, Eddy SR, Bateman A.** 2010. The  
130 Pfam protein families database. *Nucleic Acids Res.* **38:D211-D222.**
- 131 6. **Petersen TN, Brunak S, von Heijne G, Nielsen H.** 2011. SignalP 4.0: discriminating  
132 signal peptides from transmembrane regions. *Nat. Methods.* **8:785-786.**
- 133 7. **Pierleoni A, Martelli PL, Casadio R.** 2008. PredGPI: a GPI-anchor predictor. *BMC*  
134 *Bioinformatics.* **9:392.**

- 135 8. **Julenius K, Molgaard A, Gupta R, Brunak S.** 2005. Prediction, conservation analysis,  
136 and structural characterization of mammalian mucin-type O-glycosylation sites.  
137 *Glycobiology.* **15**:153-164.
- 138 9. **Kall L, Krogh A, Sonnhammer ELL.** 2007. Advantages of combined transmembrane  
139 topology and signal peptide prediction - the Phobius web server. *Nucleic Acids Res.*  
140 **35**:W429-W432.
- 141 10. **Heger A, Holm L.** 2000. Rapid automatic detection and alignment of repeats in protein  
142 sequences. *Proteins.* **41**:224-237.
- 143 11. **Crooks GE, Hon G, Chandonia JM, Brenner SE.** 2004. WebLogo: A sequence logo  
144 generator. *Genome Res.* **14**:1188-1190.
- 145 12. **Yang JK, Wang L, Ji XL, Feng Y, Li XM, Zou CG, Xu JP, Ren Y, Mi QL, Wu JL, Liu**  
146 **SQ, Liu Y, Huang XW, Wang HY, Niu XM, Li J, Liang LM, Luo YL, Ji KF, Zhou W,**  
147 **Yu ZF, Li GH, Liu YJ, Li L, Qiao M, Feng L, Zhang KQ.** 2011. Genomic and proteomic  
148 analyses of the fungus *Arthrobotrys oligospora* provide insights into nematode-trap  
149 formation. *PLoS Pathog.* **7**:e1002179.
- 150 13. **Gao QA, Jin K, Ying SH, Zhang YJ, Xiao GH, Shang YF, Duan ZB, Hu XA, Xie XQ,**  
151 **Zhou G, Peng GX, Luo ZB, Huang W, Wang B, Fang WG, Wang SB, Zhong Y, Ma**  
152 **LJ, St Leger RJ, Zhao GP, Pei Y, Feng MG, Xia YX, Wang CS.** 2011. Genome  
153 sequencing and comparative transcriptomics of the model entomopathogenic fungi  
154 *Metarhizium anisopliae* and *M. acridum*. *PLoS Genet.* **7**:e1001264.

- 155 14. Nierman WC, Pain A, Anderson MJ, Wortman JR, Kim HS, Arroyo J, Berriman M,  
156 Abe K, Archer DB, Bermejo C, Bennett J, Bowyer P, Chen D, Collins M, Coulsen R,  
157 Davies R, Dyer PS, Farman M, Fedorova N, Fedorova N, Feldblyum TV, Fischer R,  
158 Fosker N, Fraser A, Garcia JL, Garcia MJ, Goble A, Goldman GH, Gomi K, Griffith-  
159 Jones S, Gwilliam R, Haas B, Haas H, Harris D, Horiuchi H, Huang J, Humphray S,  
160 Jimenez J, Keller N, Khouri H, Kitamoto K, Kobayashi T, Konzack S, Kulkarni R,  
161 Kumagai T, Lafton A, Latge JP, Li WX, Lord A, Majoros WH, May GS, Miller BL,  
162 Mohamoud Y, Molina M, Monod M, Mouyna I, Mulligan S, Murphy L, O'Neil S,  
163 Paulsen I, Penalva MA, Perteua M, Price C, Pritchard BL, Quail MA, Rabbinowitsch  
164 E, Rawlins N, Rajandream MA, Reichard U, Renauld H, Robson GD, de Cordoba SR,  
165 Rodriguez-Pena JM, Ronning CM, Rutter S, Salzberg SL, Sanchez M, Sanchez-  
166 Ferrero JC, Saunders D, Seeger K, Squares R, Squares S, Takeuchi M, Tekaia F,  
167 Turner G, de Aldana CRV, Weidman J, White O, Woodward J, Yu JH, Fraser C,  
168 Galagan JE, Asai K, Machida M, Hall N, Barrell B, Denning DW. 2005. Genomic  
169 sequence of the pathogenic and allergenic filamentous fungus *Aspergillus fumigatus*.  
170 Nature. 438:1151-1156.
- 171 15. Galagan JE, Calvo SE, Cuomo C, Ma LJ, Wortman JR, Batzoglou S, Lee SI,  
172 Basturkmen M, Spevak CC, Clutterbuck J, Kapitonov V, Jurka J, Scazzocchio C,  
173 Farman M, Butler J, Purcell S, Harris S, Braus GH, Draht O, Busch S, D'Enfert C,  
174 Bouchier C, Goldman GH, Bell-Pedersen D, Griffiths-Jones S, Doonan JH, Yu J,  
175 Vienken K, Pain A, Freitag M, Selker EU, Archer DB, Penalva MA, Oakley BR,  
176 Momany M, Tanaka T, Kumagai T, Asai K, Machida M, Nierman WC, Denning DW,  
177 Caddick M, Hynes M, Paoletti M, Fischer R, Miller B, Dyer P, Sachs MS, Osmani SA,



- 178        **Birren BW.** 2005. Sequencing of *Aspergillus nidulans* and comparative analysis with *A.*  
179        *fumigatus* and *A. oryzae*. *Nature*. **438**:1105-1115.
- 180    16. **Dean RA, Talbot NJ, Ebbole DJ, Farman ML, Mitchell TK, Orbach MJ, Thon M,**  
181        **Kulkarni R, Xu JR, Pan HQ, Read ND, Lee YH, Carbone I, Brown D, Oh YY,**  
182        **Donofrio N, Jeong JS, Soanes DM, Djonovic S, Kolomiets E, Rehmeier C, Li WX,**  
183        **Harding M, Kim S, Lebrun MH, Bohnert H, Coughlan S, Butler J, Calvo S, Ma LJ,**  
184        **Nicol R, Purcell S, Nusbaum C, Galagan JE, Birren BW.** 2005. The genome sequence of  
185        the rice blast fungus *Magnaporthe grisea*. *Nature*. **434**:980-986.
- 186    17. **Rice P, Longden I, Bleasby A.** 2000. EMBOSS: The European molecular biology open  
187        software suite. *Trends Genet*. **16**:276-277.
- 188    18. **Katoh K, Misawa K, Kuma K, Miyata T.** 2002. MAFFT: a novel method for rapid  
189        multiple sequence alignment based on fast Fourier transform. *Nucleic Acids Res*. **30**:3059-  
190        3066.
- 191    19. **Guindon S, Lethiec F, Duroux P, Gascuel O.** 2005. PHYML Online - a web server for  
192        fast maximum likelihood-based phylogenetic inference. *Nucleic Acids Res*. **33**:W557-  
193        W559.
- 194    20. **Letunic I, Bork P.** 2011. Interactive tree of life v2: online annotation and display of  
195        phylogenetic trees made easy. *Nucleic Acids Res*. **39**:W475-W478.
- 196
- 197
